# Supplementary material for: Detection and characterization of selenoproteins by tandem mass spectrometry assisted by laser ablation inductively coupled plasma mass spectrometry: application to human plasma selenoproteins
Source: Royal Society of Chemistry journal article supplement (doi:10.1039/c0ja00115e), 2010-11-17

## **Supplementary Information**

- a. Experimental MS/MS spectra assigned for human glutathione peroxidase 3 selenoprotein peptides in this study (top portion) and comparison with consensus spectra from the NIST Peptide Mass Spectral Library (bottom portion).
  
- b. Experimental MS/MS spectra assigned for human selenoprotein P peptides in this study (top portion) and comparison with consensus spectra from the NIST Peptide Mass Spectral Library (bottom portion).

a. Glutathione peroxidase 3 peptides

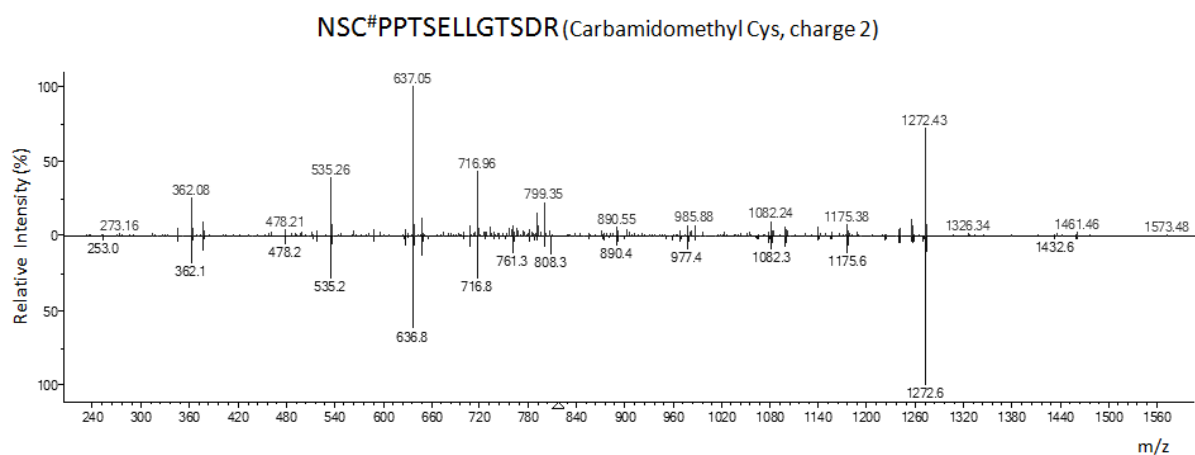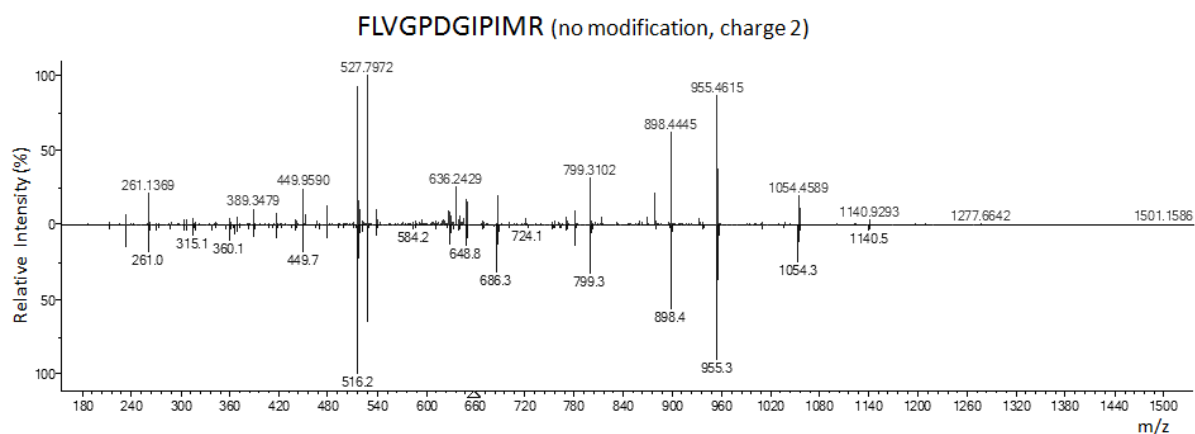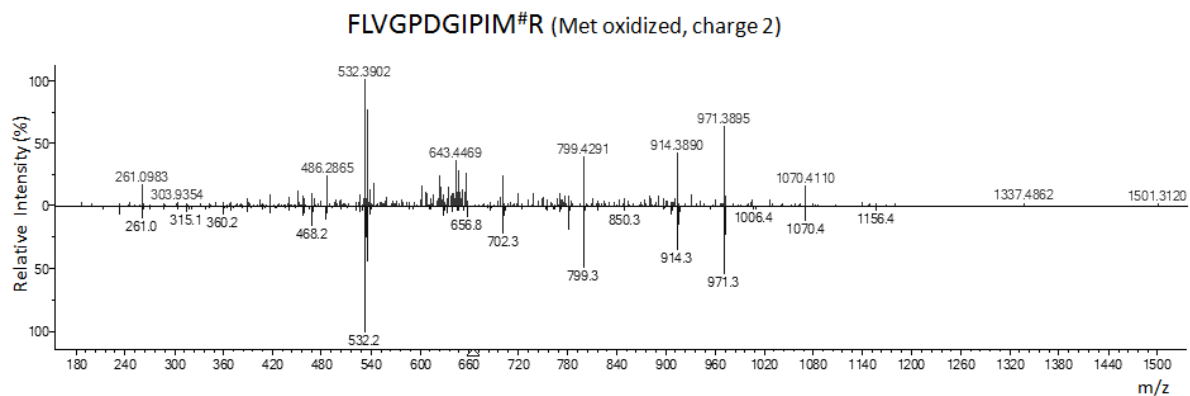

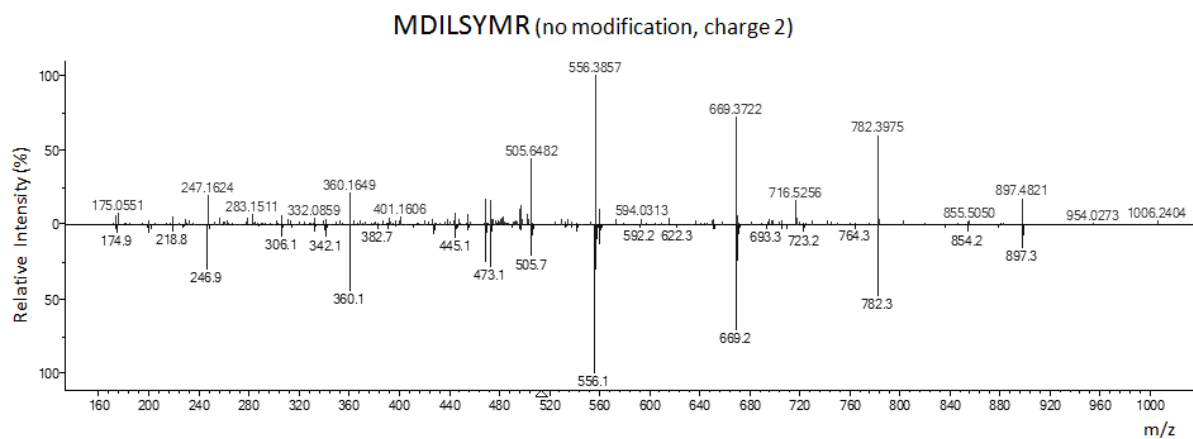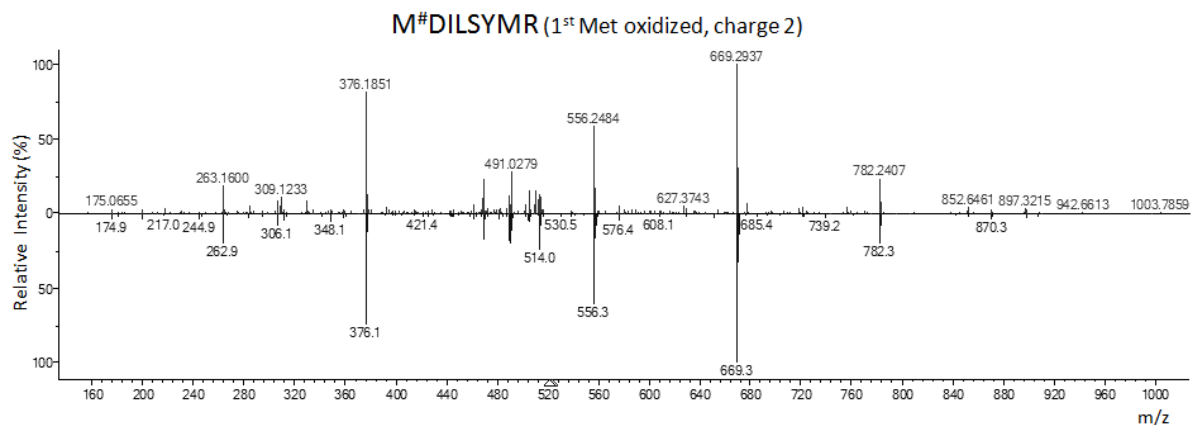

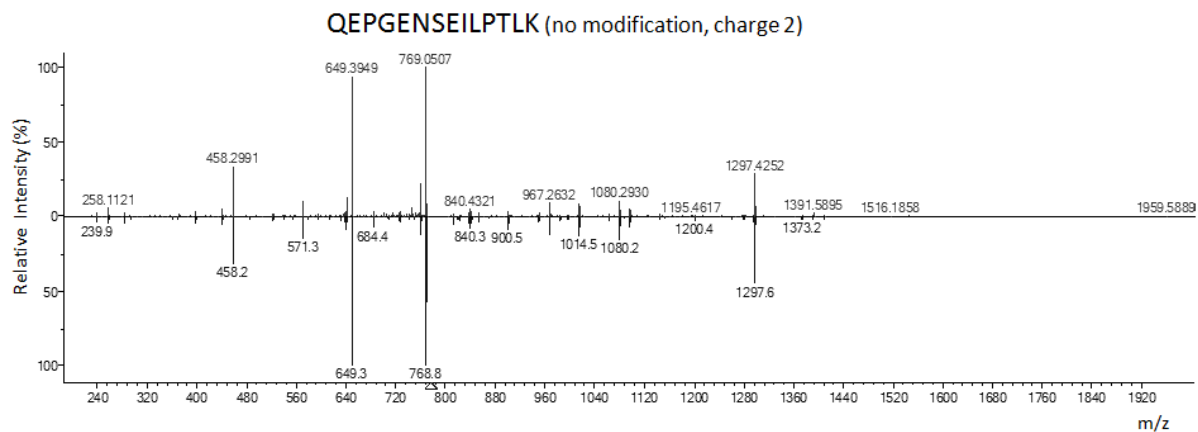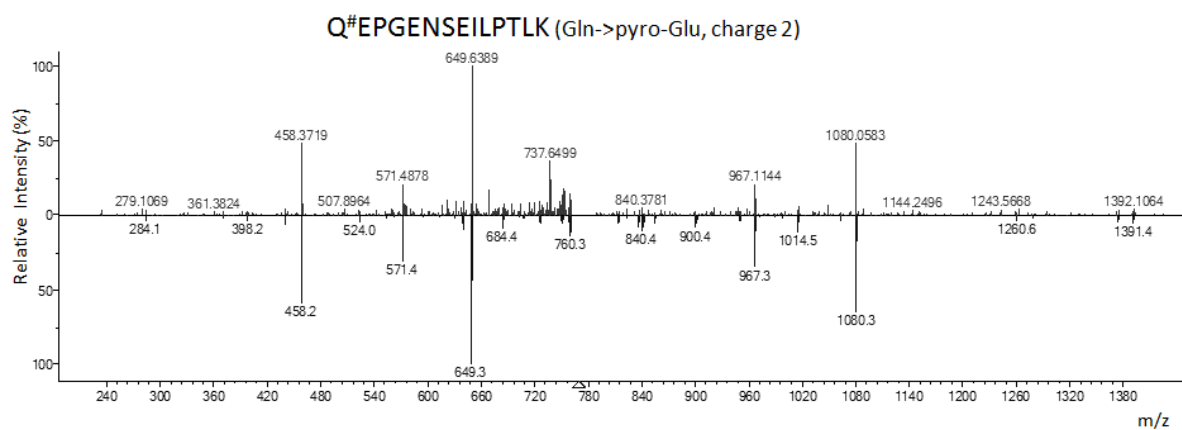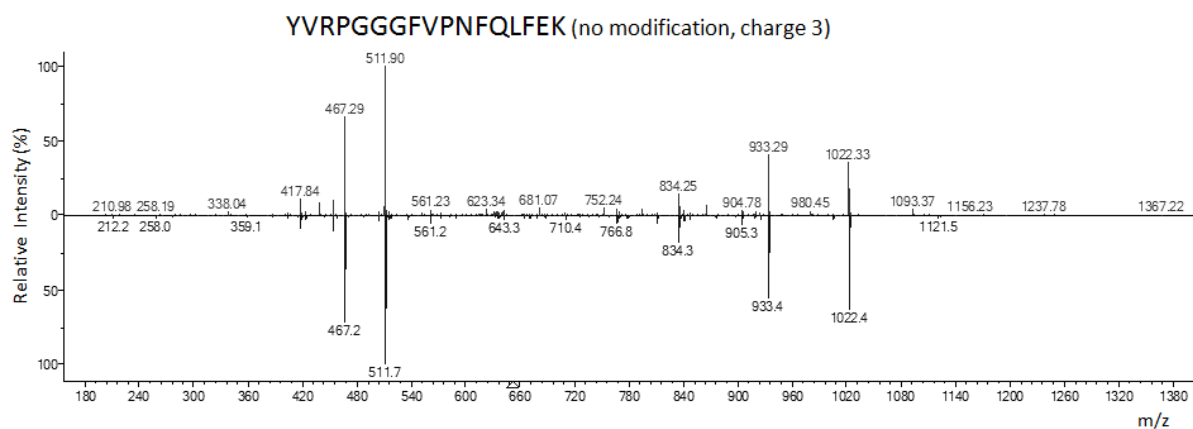

b. Selenoprotein P peptides

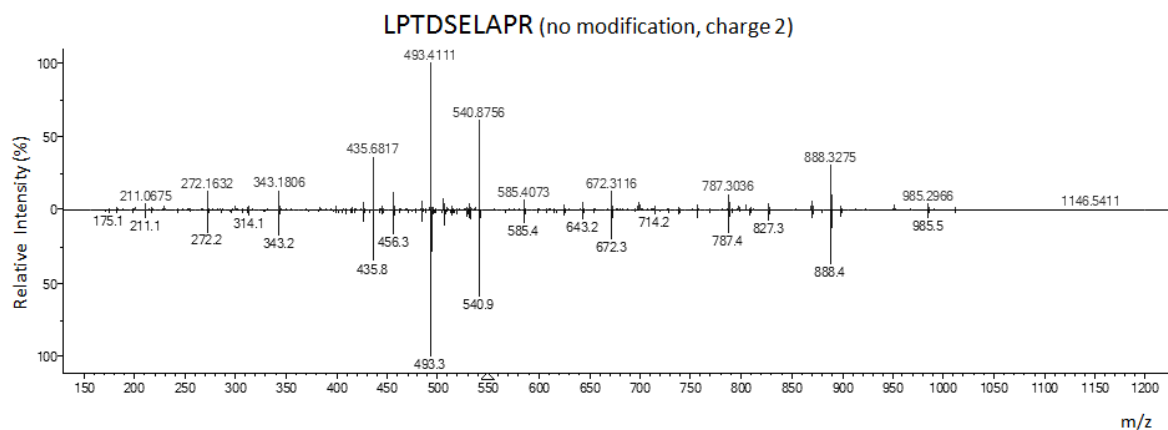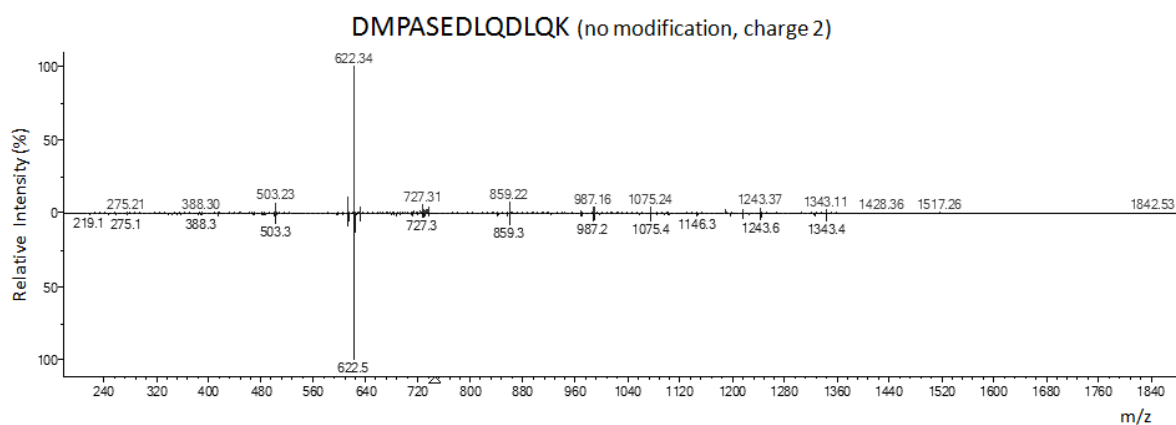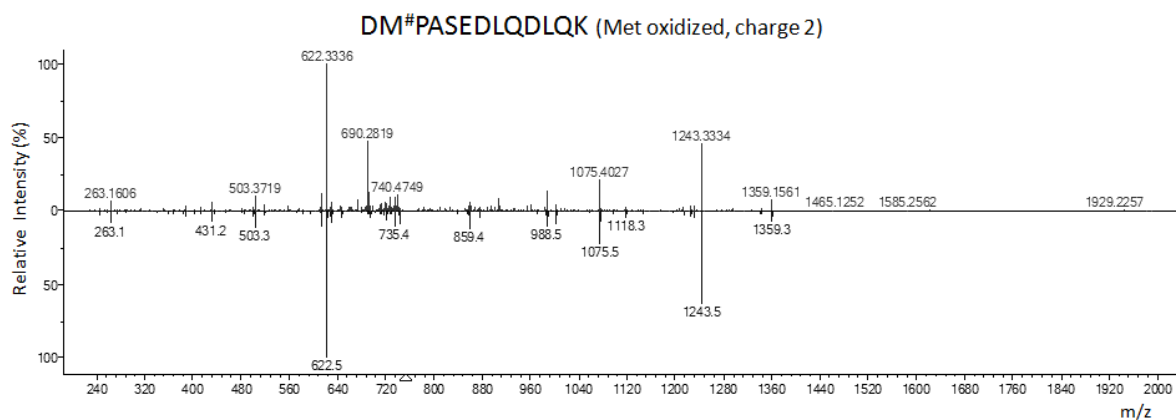

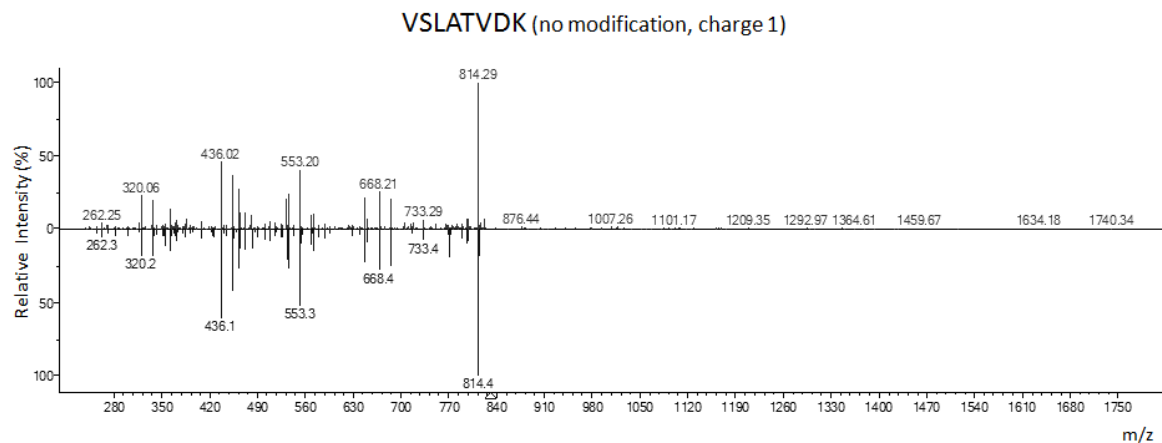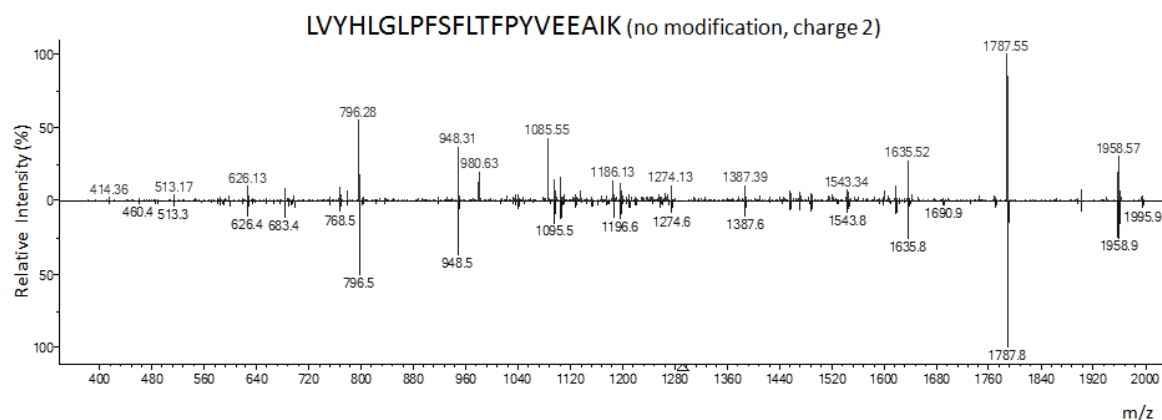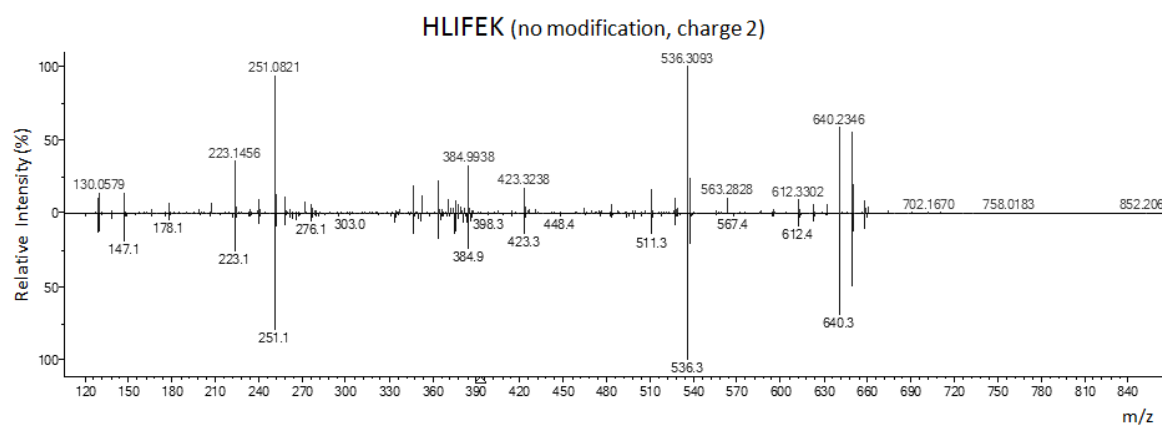

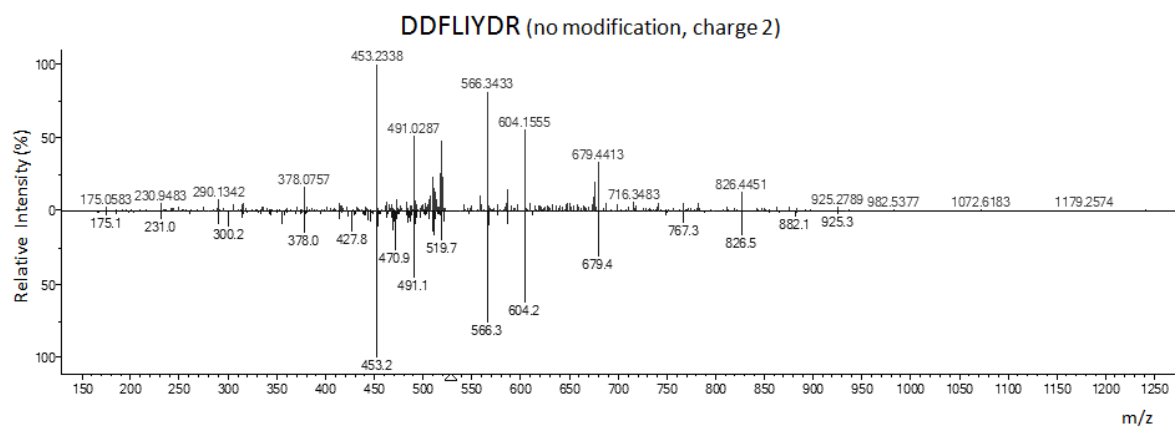

Supplement: c0ja00115e.pdf [file c0ja00115e.pdf]
